# Supplementary material for: DAF-16/FOXO promotes taste avoidance learning independently of axonal insulin-like signaling
Source: PubMed Central journal article supplement (PMC6668909; doi:10.1371/journal.pgen.1008297), 2019-07-19

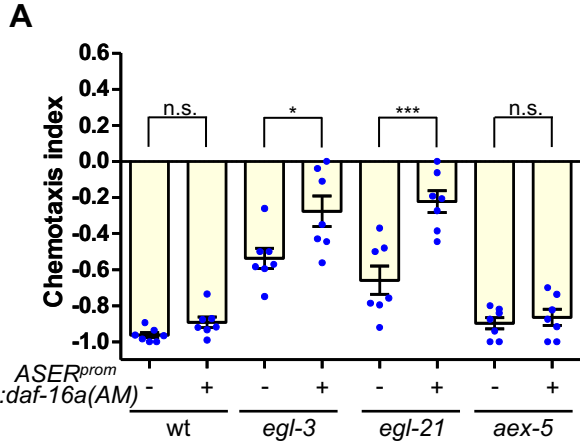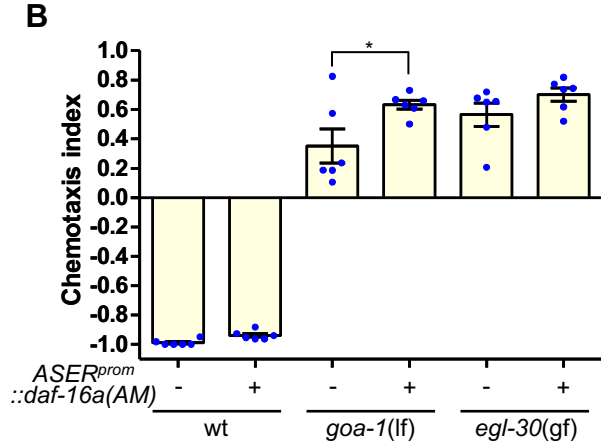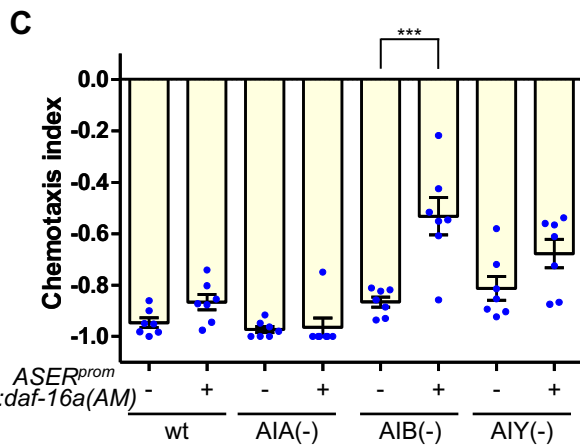

Supplement: pgen.1008297.s007.pdf [file pgen.1008297.s007.pdf]
